# Supplementary material
Source: MDPI journal article supplement (https://www.mdpi.com/2072-4292/14/1/12)
Supplement: s1 [file s1]

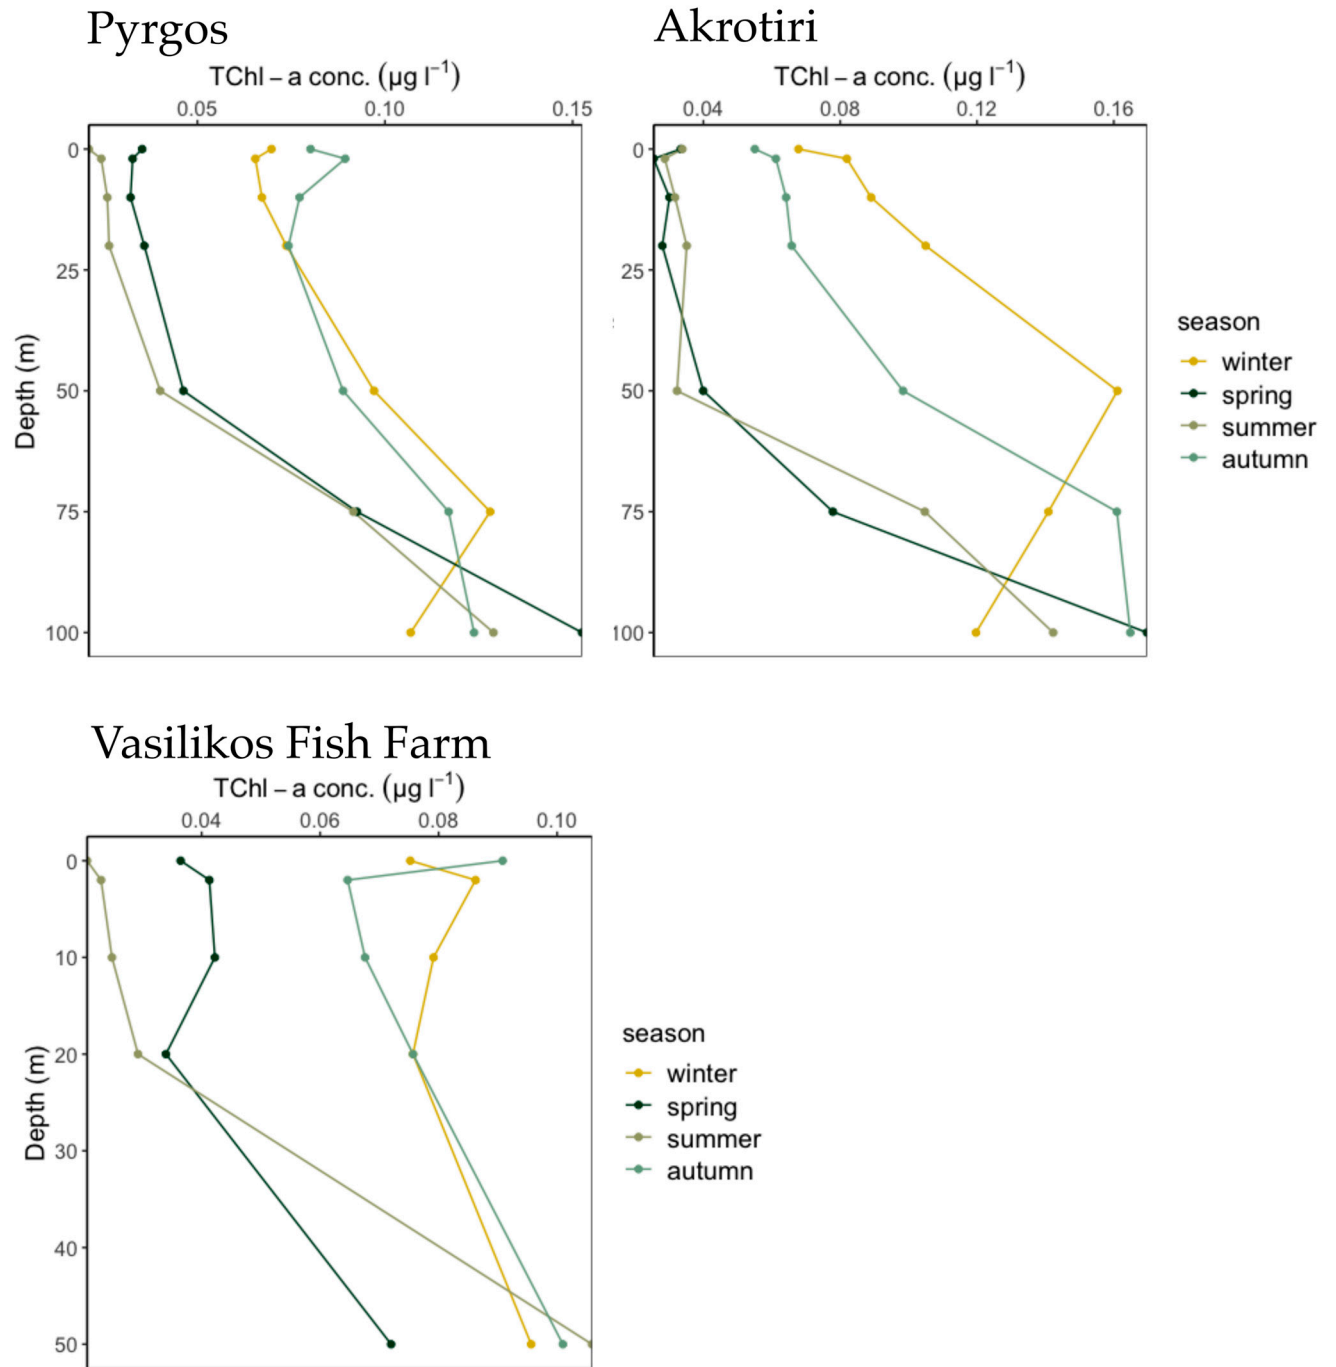

Figure S1: Vertical distribution of average total Chl-a per season, for the 4 sampling stations, PYR, AKR and VAS.

# Pyrgos

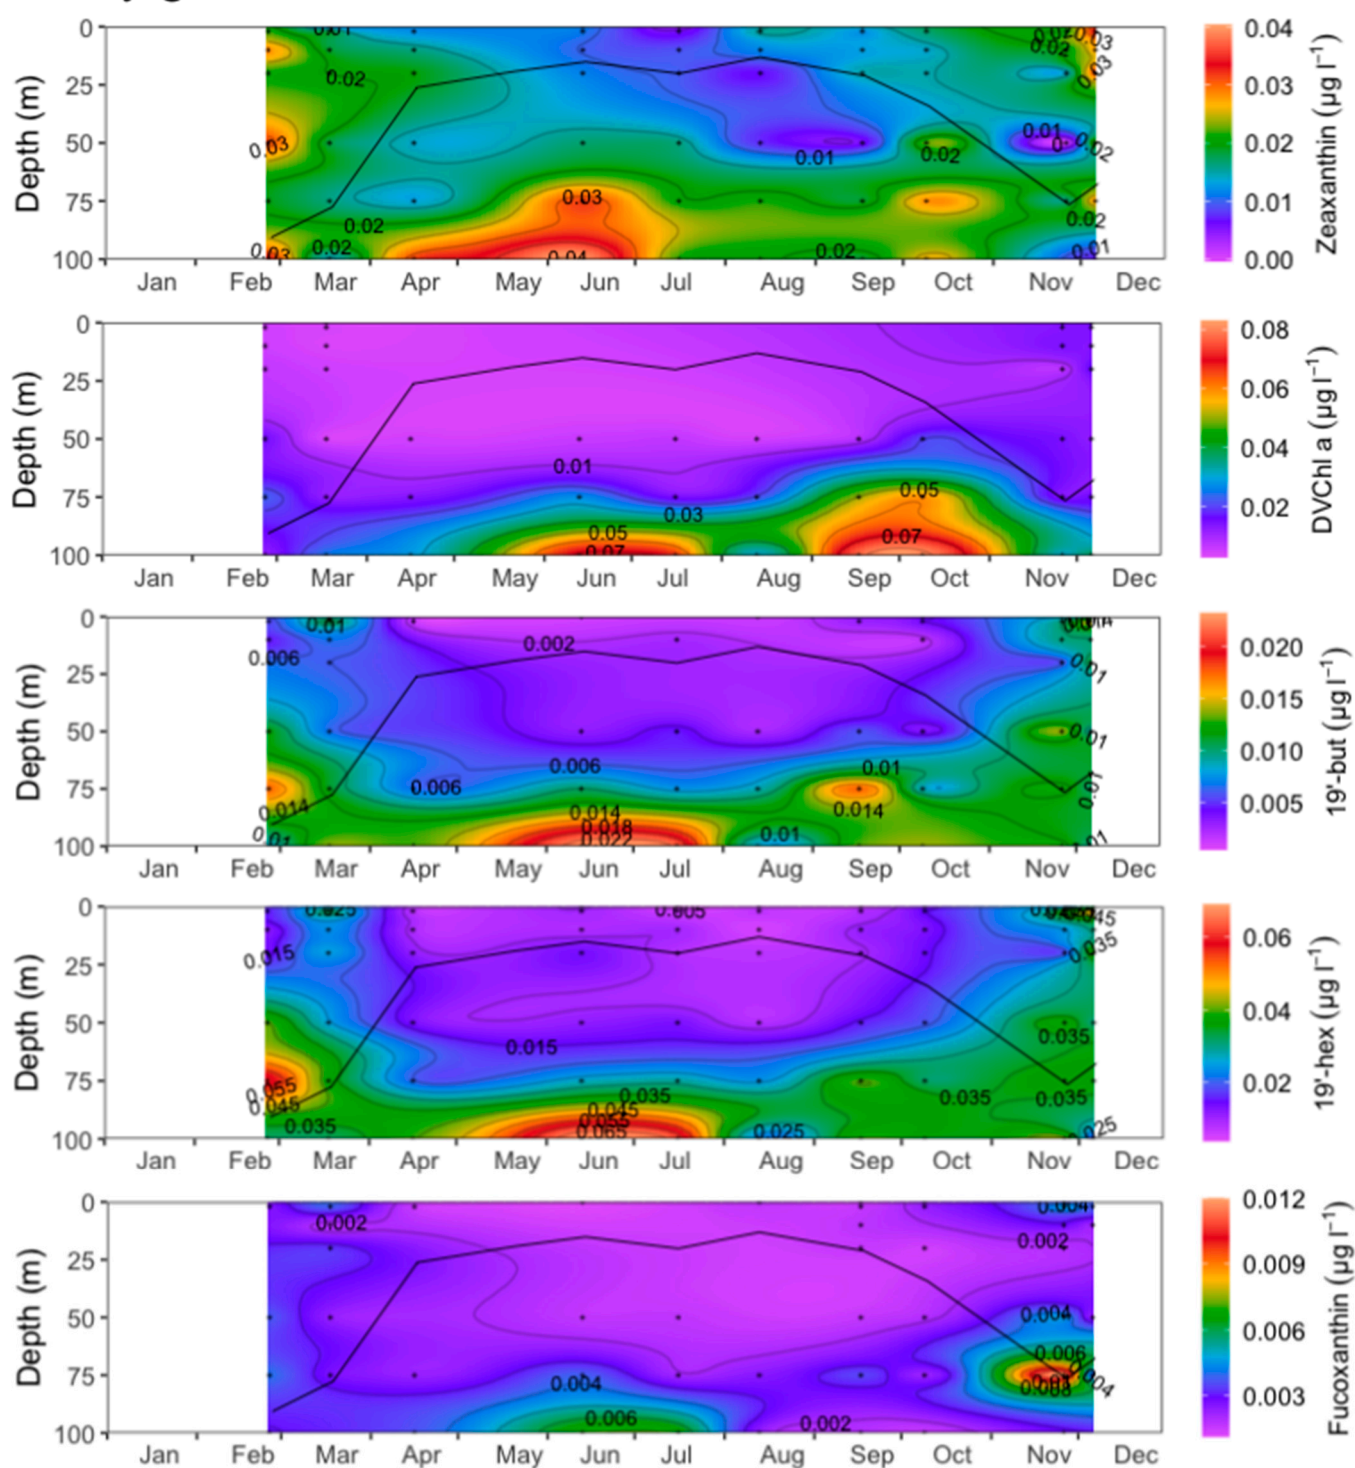

# Akrotiri

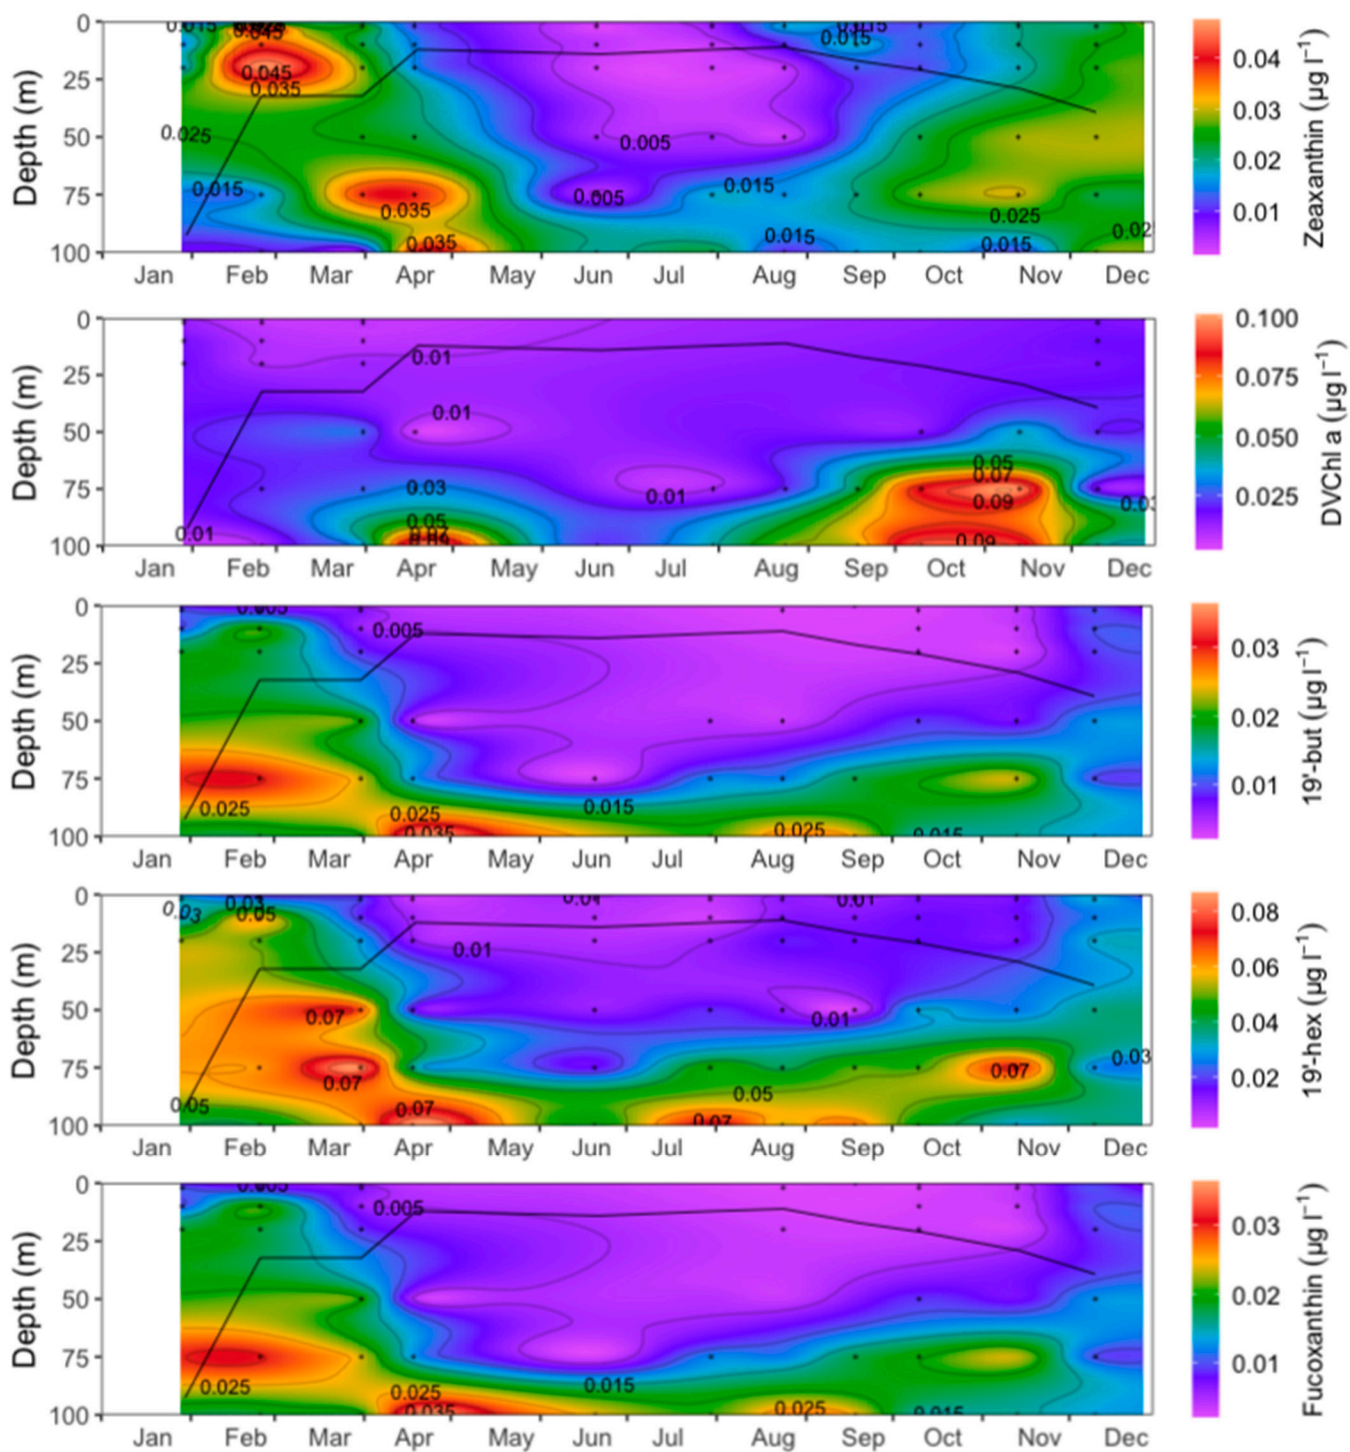



## Vasilikos Fish Farm

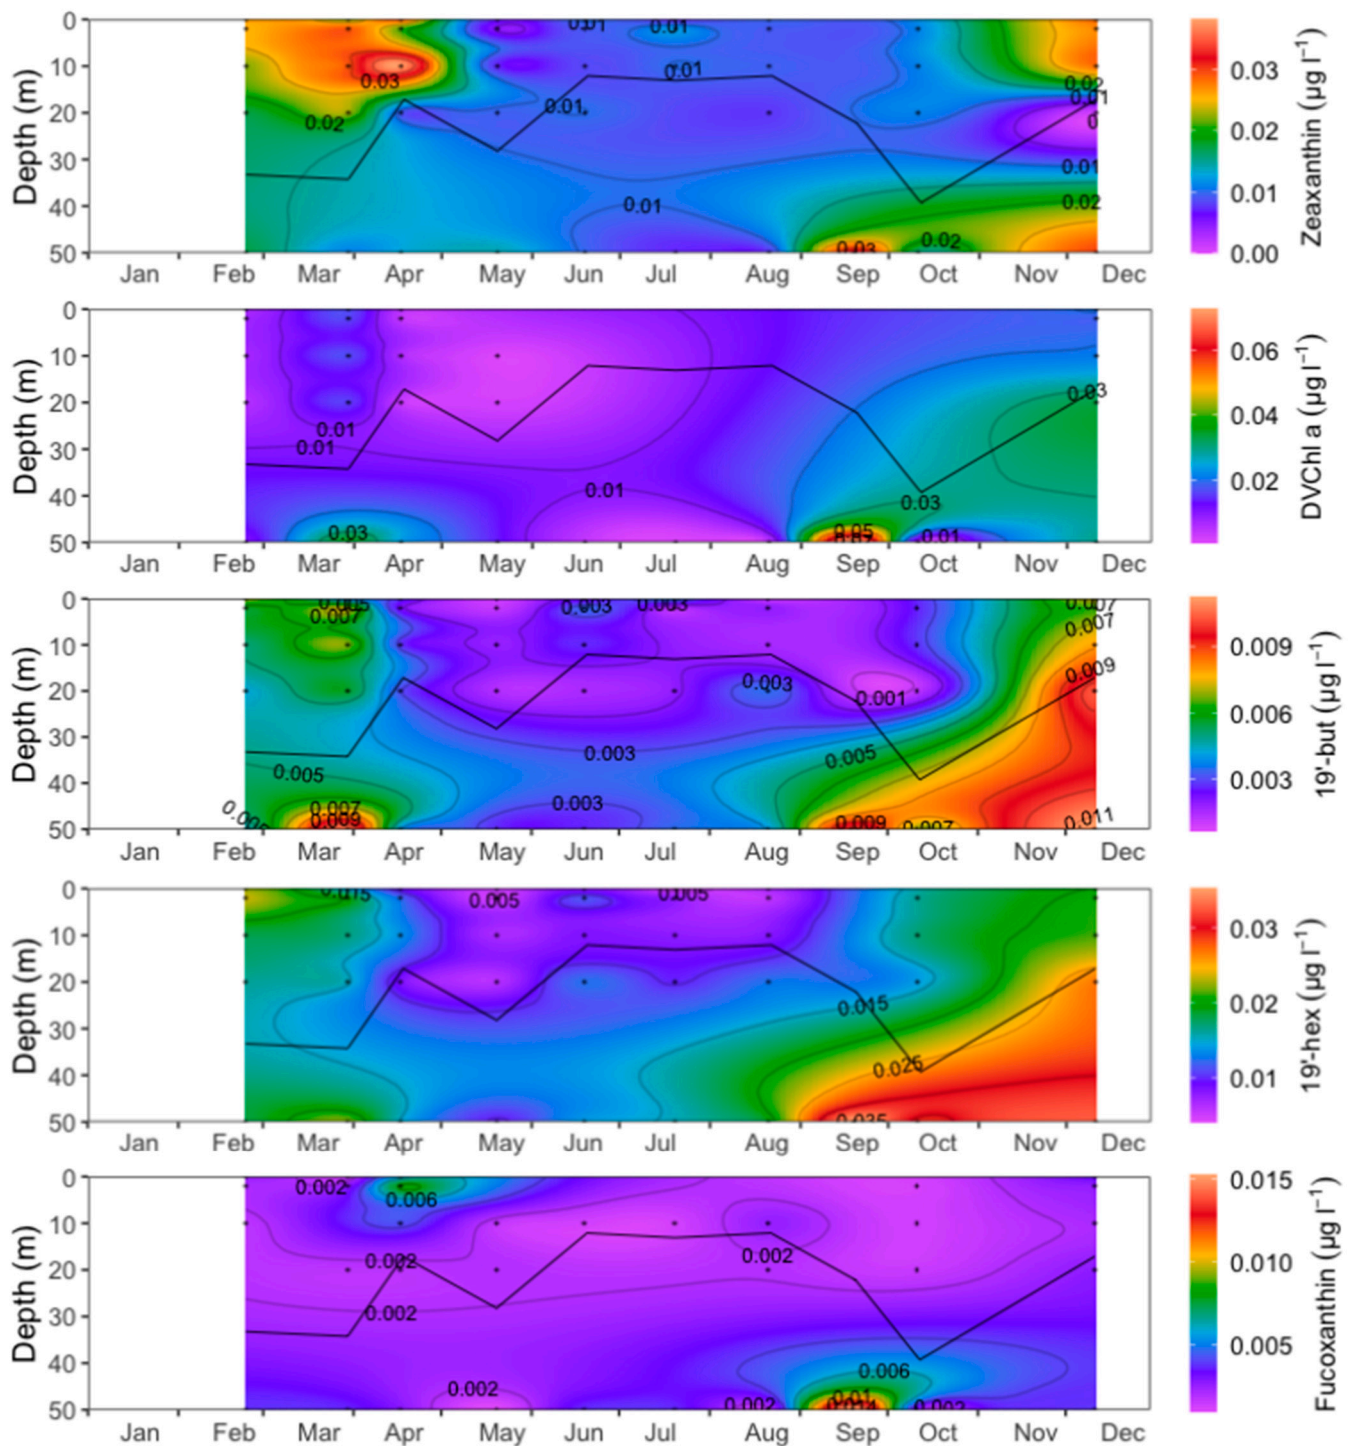

Figure S2: Contour plots of major accessory pigments (Zeaxanthin and Divinyl-chlorophyll a (picoplankton), 19'-butanoyloxyfucoxanthin and 19'-hexanoyloxyfucoxanthin (nanoplankton) and Fucoxanthin (microplankton), for PYR, AKR and VAS.



# Pyrgos

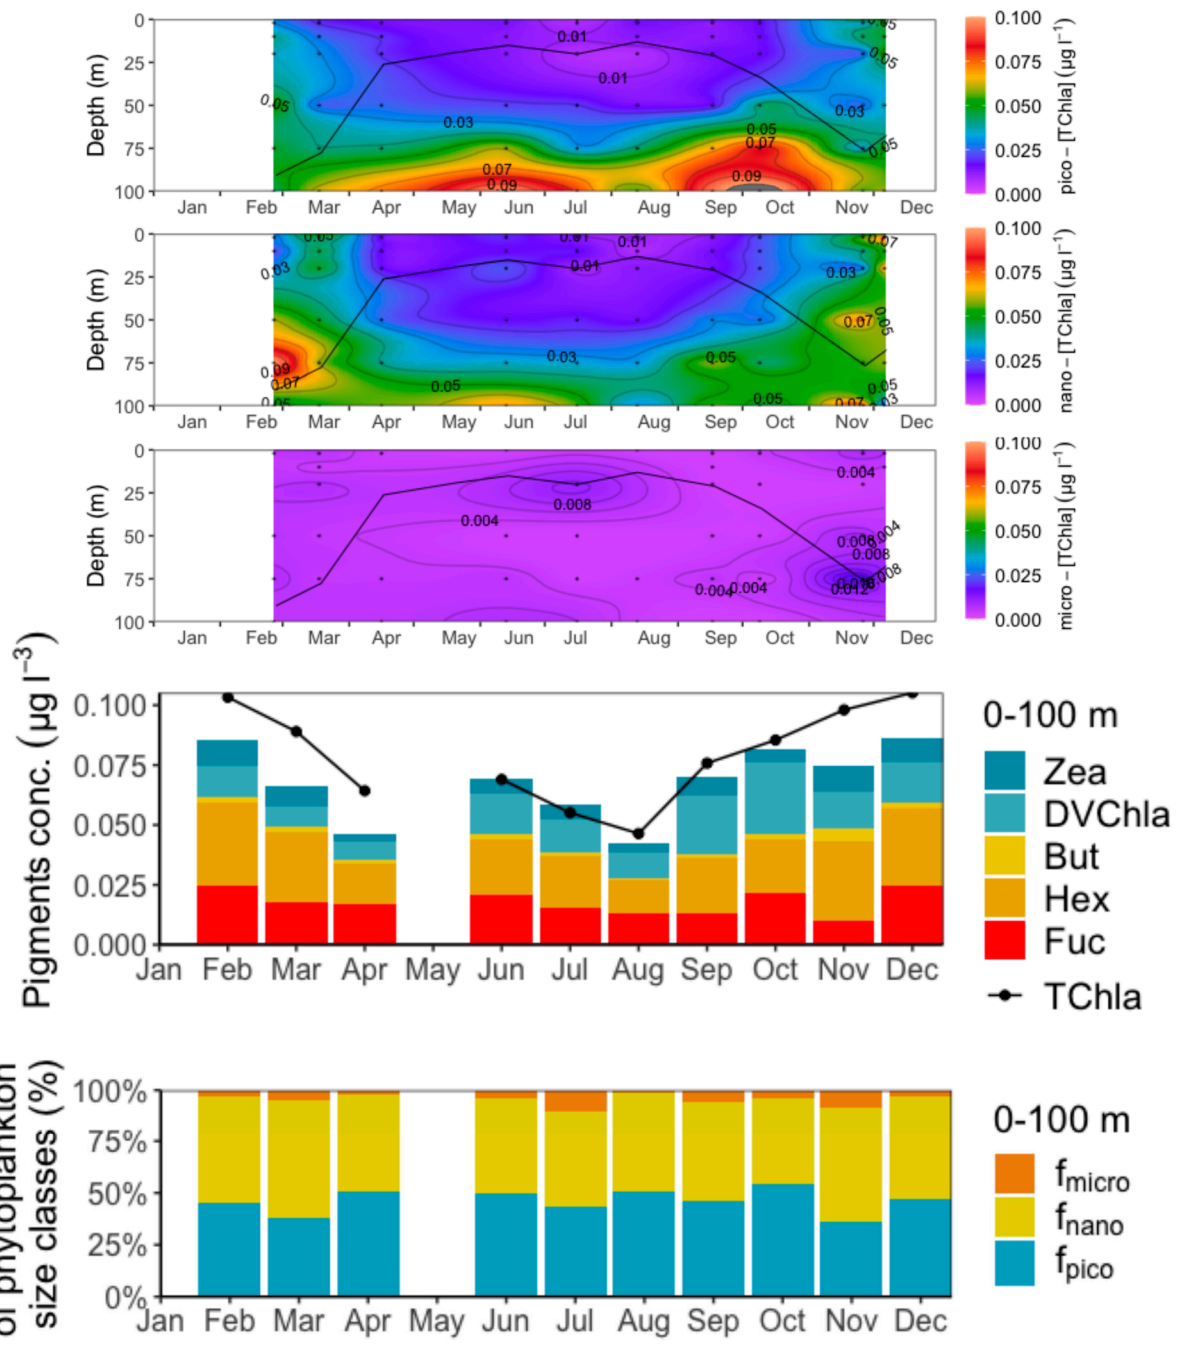

# Akrotiri

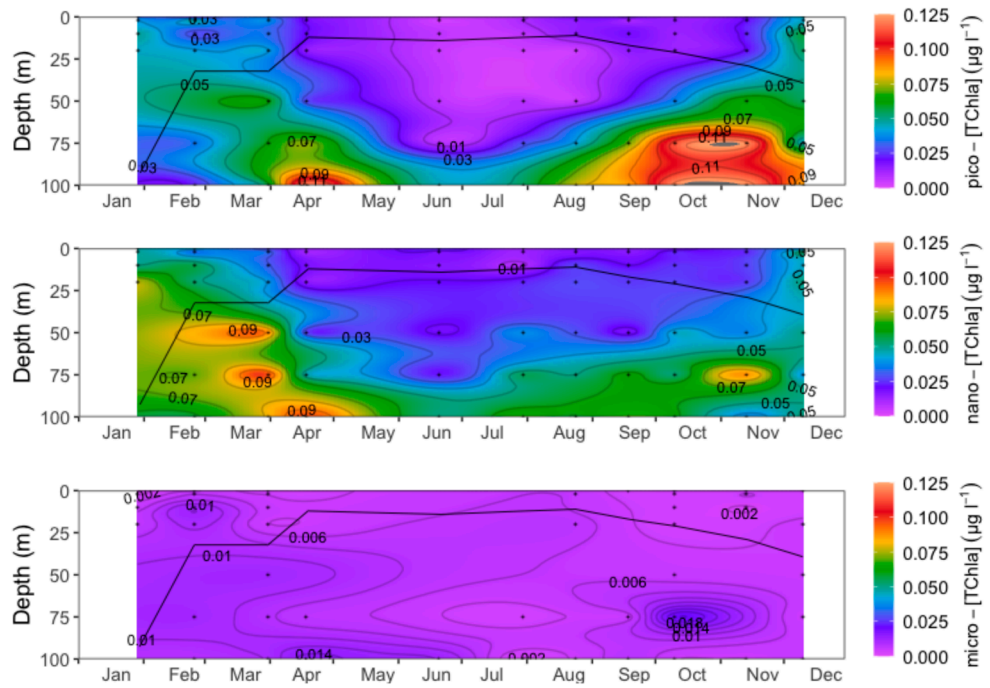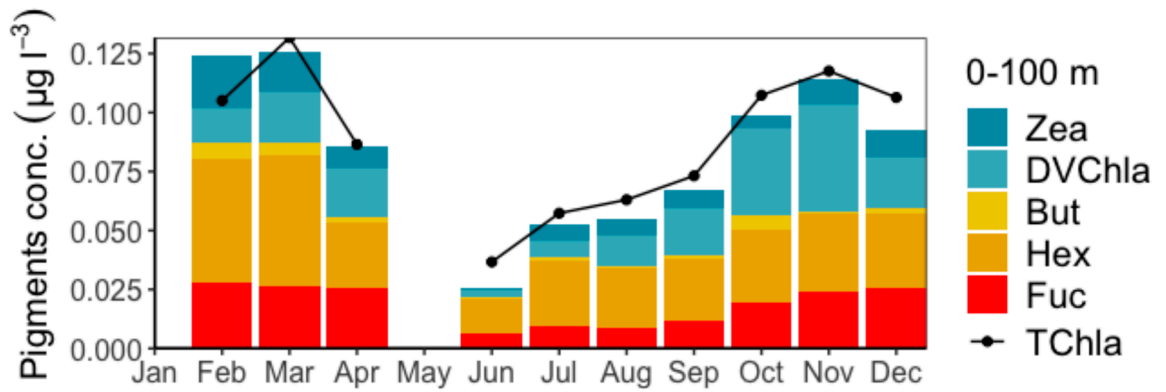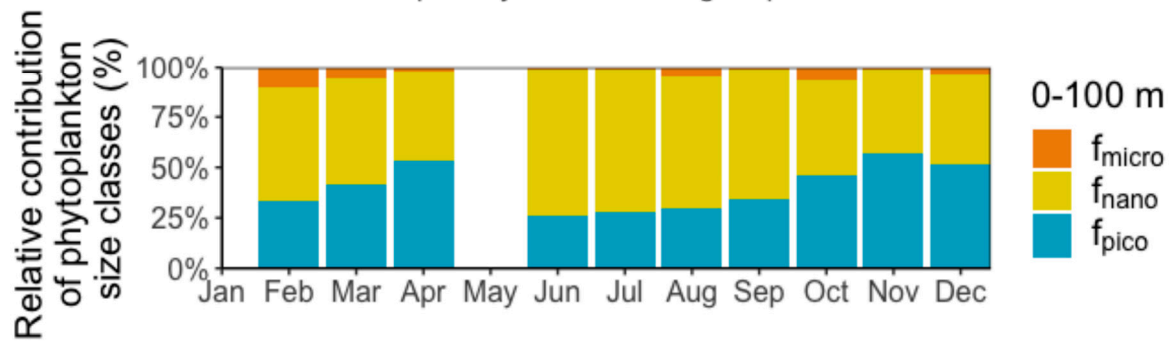

## Vasilikos Fish Farm

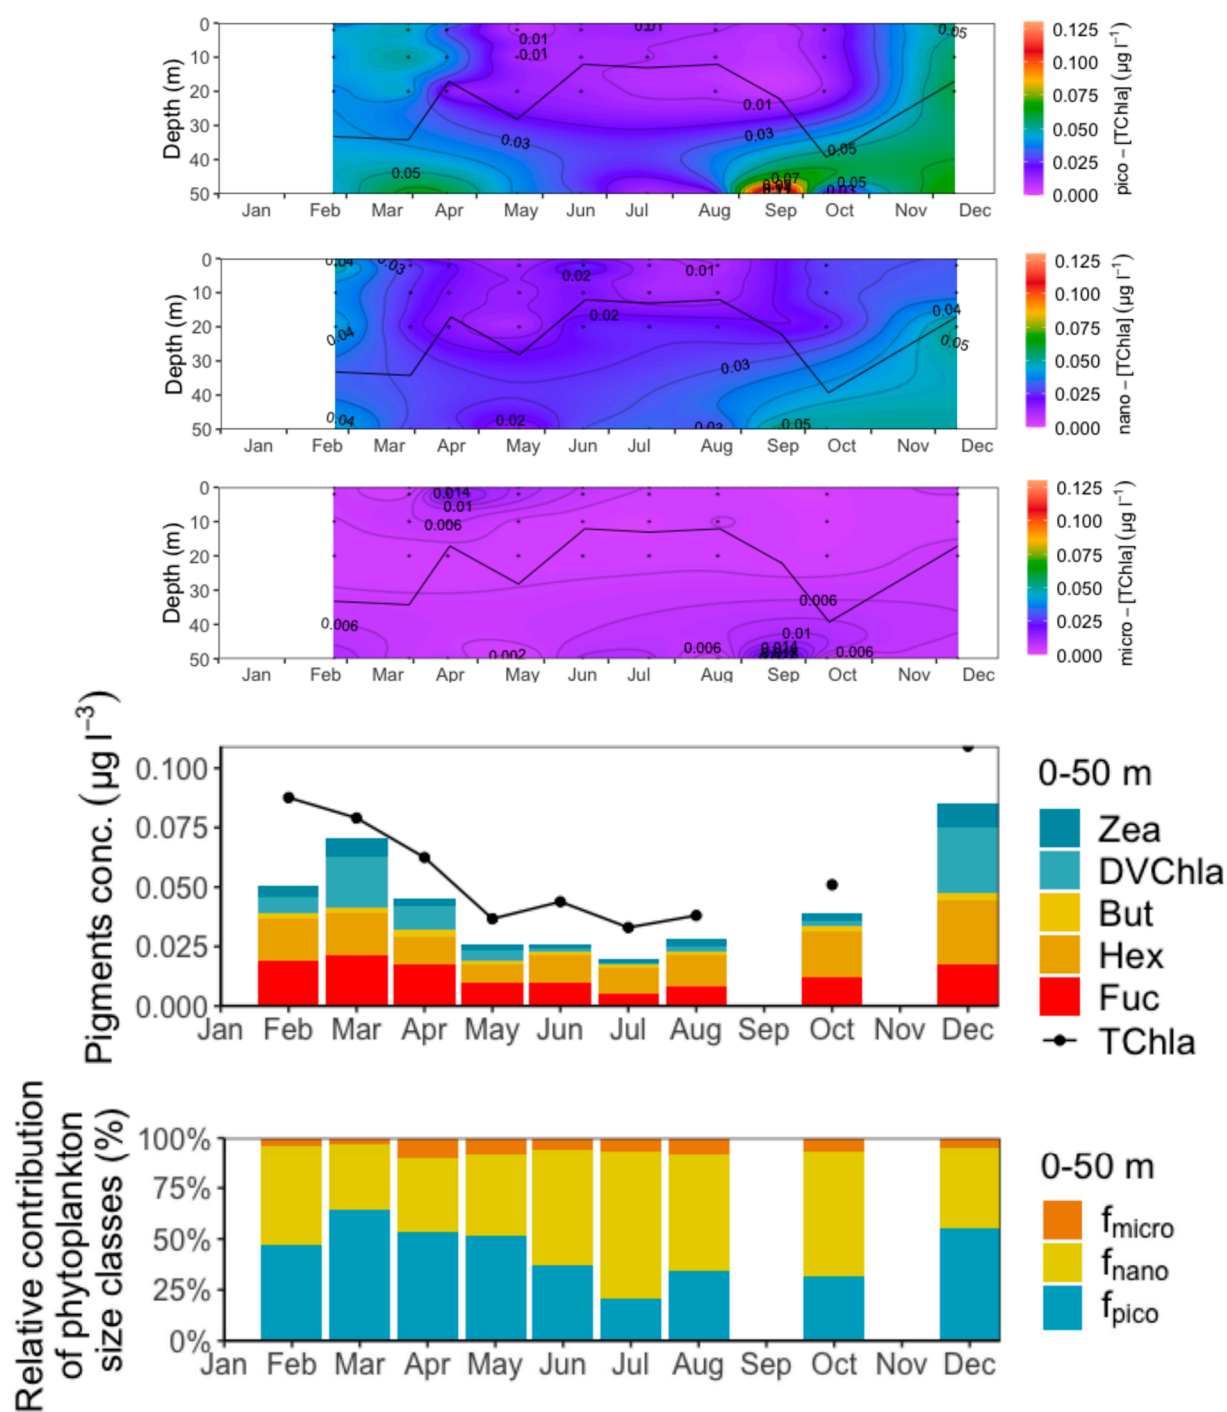

Figure S3: Total Chl-a concentrations associated to the pico-, nano- and microphytoplankton size classes, main diagnostic pigments concentration and relative contribution of phytoplankton size classes, for stations PYR, AKR and VAS.



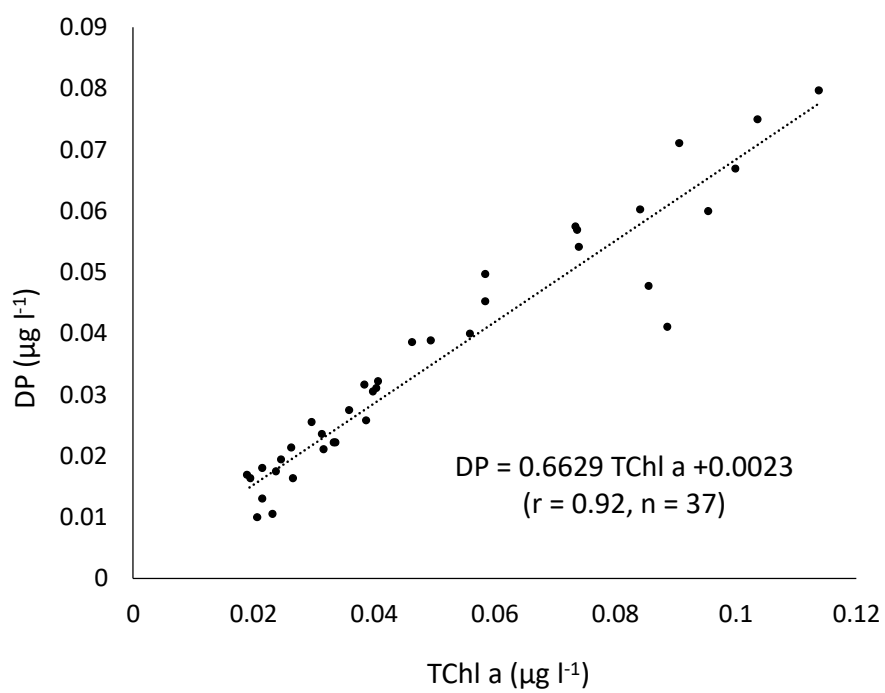

Figure S4: Relationship between 0 – 20 m depth-integrated concentrations of DP and TChl a.
